# Supplementary material for: Coverage and effectiveness of conditional cash transfer for people with drug resistant tuberculosis in Zimbabwe: A mixed methods study
Source: PLOS Glob Public Health. 2022 Dec 21;2(12):e0001027. doi: 10.1371/journal.pgph.0001027 (PMC10021731; doi:10.1371/journal.pgph.0001027)
Supplement: S1 Data — (CSV) [file pgph.0001027.s004.csv]

Uniqueid	prov	id	sitename	age	sex	hiv	art	pttype	enroldat	rxreg	comprx	phasestop	trtoutcom	outcdat	regcash	amnt	disbursdat
1-Nk-2	2	1	Nk	60	1	0	8	0	16/11/2020	0	1	1	1	10/10/2021	1	150	16/04/2021
2-Nk-2	2	2	Nk	39	1	1	1	0	31/01/2020	0	0	0	2	03/03/2020	0	998	30-12-1899
3-Nk-2	2	3	Nk	49	1	0	8	0	19/02/2020	0	1	1	1	12/01/2021	1	225	16/04/2020
5-Nk-2	2	5	Nk	32	1	1	1	0	24/11/2020	0	1	1	1	15/10/2021	1	200	16/04/2021
4-Nk-2	2	4	Nk	49	1	1	1	9	23/03/2020	0	0	1	2	28/10/2020	0	998	30-12-1899
6-Nk-2	2	6	Nk	32	1	1	1	0	28/11/2016	1	1	1	0	10/12/2018	1	400	10/12/2018
7-Nk-2	2	7	Nk	63	1	1	1	0	23/10/2015	1	0	0	4	17/02/2016	1	400	17/02/2016
8-Nk-2	2	8	Nk	40	1	1	1	0	31/10/2015	0	0	1	4	09/05/2016	1	75	09/05/2016
9-Nk-2	2	9	Nk	35	1	1	1	0	02/11/2015	1	0	1	4	03/05/2016	1	225	03/05/2016
10-Nk-2	2	10	Nk	18	1	1	1	0	09/12/2015	1	0	0	4	24/05/2016	1	75	24/05/2016
11-Nk-2	2	11	Nk	42	0	1	1	0	22/01/2016	1	0	0	4	17/03/2016	1	225	17/03/2016
12-Nk-2	2	12	Nk	38	0	1	1	0	09/06/2015	1	0	0	4	09/06/2015	1	75	09/07/2015
13-Nk-2	2	13	Nk	31	0	1	0	0	22/01/2016	1	0	1	2	24/01/2016	0	998	30-12-1899
14-Nk-2	2	14	Nk	28	0	1	0	0	11/01/2017	1	0	0	2	12/01/2017	0	998	30-12-1899
15-Nk-2	2	15	Nk	39	0	1	0	0	18/11/2016	1	1	1	1	10/12/2018	0	998	30-12-1899
16-Nk-2	2	16	Nk	20	0	1	1	1	25/10/2017	1	1	1	0	21/07/2019	1	75	21/07/2019
17-Nk-2	2	17	Nk	35	0	1	1	1	27/10/2017	1	0	0	2	28/12/2017	0	998	30-12-1899
18-Nk-2	2	18	Nk	50	1	1	1	0	18/09/2017	1	0	0	2	18/09/2017	0	998	30-12-1899
19-Nk-2	2	19	Nk	32	0	0	8	0	12/01/2018	1	1	1	1	12/09/2019	1	150	12/09/2019
20-Nk-2	2	20	Nk	26	0	0	8	0	18/01/2018	1	1	1	1	21/01/2019	1	300	21/01/2019
21-Nk-2	2	21	Nk	56	1	1	1	0	15/02/2018	1	1	1	0	07/10/2019	1	225	07/10/2019
22-Nk-2	2	22	Nk	39	1	1	1	0	15/02/2018	1	0	0	2	10/04/2018	0	998	30-12-1899
23-Nk-2	2	23	Nk	54	1	1	1	1	26/02/2018	1	0	0	2	03/03/2018	0	998	30-12-1899
24-Nk-2	2	24	Nk	35	0	0	8	0	14/03/2018	1	1	1	0	12/11/2019	0	998	30-12-1899
25-Nk-2	2	25	Nk	50	1	0	8	0	10/07/2018	1	1	1	0	10/05/2020	1	75	10/05/2019
26-Nk-2	2	26	Nk	40	0	1	1	0	30/04/2018	1	0	0	2	28/05/2018	0	998	30-12-1899
27-Nk-2	2	27	Nk	40	1	0	8	0	07/08/2018	1	1	1	0	06/05/2019	0	998	30-12-1899
28-Nk-2	2	28	Nk	41	1	1	1	0	27/08/2018	1	1	1	0	15/07/2019	0	998	30-12-1899
29-Nk-2	2	29	Nk	20	0	1	1	0	09/10/2018	0	1	1	0	28/10/2019	0	998	30-12-1899
30-Nk-2	2	30	Nk	30	0	1	1	0	28/10/2017	1	1	1	1	28/10/2019	0	998	30-12-1899
31-Nk-2	2	31	Nk	22	0	1	1	0	18/09/2018	1	1	1	0	10/09/2020	1	550	15/12/2018
32-Nk-2	2	32	Nk	65	1	1	1	1	18/06/2019	1	1	1	1	19/06/2021	1	75	25/09/2019
33-Nk-2	2	33	Nk	18	0	0	8	0	12/10/2020	1	1	1	1	15/09/2021	1	200	15/04/2021
34-Nk-2	2	34	Nk	32	1	1	1	0	30/09/2019	0	1	1	1	15/09/2020	1	200	15/02/2020
1-Nku-2	2	1	Nku	37	1	1	1	0	24/07/2020	0	1	1	0	10/05/2021	1	75	15/04/2021
2-Nku-2	2	2	Nku	36	1	1	1	0	12/11/2020	0	1	1	1	15/10/2021	1	150	15/04/2021
3-Nku-2	2	3	Nku	24	1	0	8	0	02/08/2018	1	1	1	1	10/05/2020	1	325	10/05/2020
4-Nku-2	2	4	Nku	29	1	0	8	0	04/04/2020	0	1	1	1	10/05/2021	1	250	15/12/2020
5-Nku-2	2	5	Nku	34	1	0	8	0	13/01/2020	0	1	1	1	14/12/2020	1	225	15/03/2021
6-Nku-2	2	6	Nku	29	1	0	8	0	26/01/2021	0	1	1	1	15/12/2021	1	200	15/03/2021
7-Nku-2	2	7	Nku	23	1	9	9	1	14/11/2018	1	0	0	4	15/12/2018	1	100	12/03/2019
8-Nku-2	2	8	Nku	37	0	1	1	9	26/10/2015	1	0	0	2	07/01/2016	0	998	30-12-1899
9-Nku-2	2	9	Nku	37	1	1	1	1	23/02/2015	1	1	1	0	02/03/2017	1	150	02/03/2017
10-Nku-2	2	10	Nku	31	0	1	1	1	07/03/2015	1	1	1	0	09/03/2017	1	75	09/03/2017
11-Nku-2	2	11	Nku	27	0	1	1	0	28/08/2015	1	0	0	2	01/09/2015	0	998	30-12-1899
12-Nku-2	2	12	Nku	47	1	1	1	0	06/08/2015	1	1	1	0	31/08/2017	1	150	31/08/2017
13-Nku-2	2	13	Nku	38	1	1	0	9	23/10/2015	1	0	0	2	11/12/2015	0	998	30-12-1899
14-Nku-2	2	14	Nku	56	1	1	1	0	04/03/2016	1	1	1	1	28/03/2018	1	175	28/03/2018
15-Nku-2	2	15	Nku	49	1	1	1	1	22/04/2016	1	0	1	4	16/10/2017	1	300	16/10/2017
16-Nku-2	2	16	Nku	38	0	1	1	1	31/10/2016	1	0	1	4	09/06/2017	0	998	30-12-1899
17-Nku-2	2	17	Nku	34	1	1	1	0	14/06/2017	1	0	0	4	14/06/2017	0	998	30-12-1899
18-Nku-2	2	18	Nku	32	1	0	8	0	14/06/2017	1	1	1	1	26/01/2019	1	325	26/01/2019
19-Nku-2	2	19	Nku	37	0	0	8	0	24/11/2017	1	0	0	4	15/02/2018	1	300	15/02/2018
7-Pum-2	2	7	Pum	13	0	1	1	0	17/01/2018	1	0	1	2	12/12/2018	1	75	12/12/2018
8-Pum-2	2	8	Pum	31	1	1	1	1	01/01/2015	1	0	1	2	10/03/2015	0	998	30-12-1899
9-Pum-2	2	9	Pum	22	1	0	8	9	11/01/2016	1	1	1	1	22/12/2017	1	225	22/12/2017
10-Pum-2	2	10	Pum	36	0	1	1	1	09/11/2016	1	1	1	1	10/10/2018	1	300	10/10/2018
11-Pum-2	2	11	Pum	38	1	1	1	0	26/01/2016	1	1	1	1	15/12/2017	1	300	15/12/2017
12-Pum-2	2	12	Pum	24	1	0	8	1	06/10/2015	1	0	1	4	10/04/2016	1	150	10/04/2016
13-Pum-2	2	13	Pum	17	0	1	1	1	18/11/2015	1	0	1	4	12/07/2016	1	200	12/07/2016
1-Pum-2	2	1	Pum	29	1	1	1	0	06/01/2020	0	1	1	0	07/01/2021	0	998	30-12-1899
2-Pum-2	2	2	Pum	31	0	1	1	0	07/01/2021	0	1	1	1	10/12/2021	1	200	15/04/2021
3-Pum-2	2	3	Pum	26	1	1	1	1	19/02/2021	0	1	1	1	25/11/2021	1	150	15/04/2021
4-Pum-2	2	4	Pum	35	1	1	1	1	26/11/2019	0	1	1	0	08/09/2020	0	998	30-12-1899
5-Pum-2	2	5	Pum	40	1	1	1	1	25/09/2019	0	1	1	0	30/08/2020	0	998	30-12-1899
6-Pum-2	2	6	Pum	36	0	1	1	0	12/12/2017	1	0	1	2	31/05/2018	0	998	30-12-1899
15-Pum-2	2	15	Pum	23	0	1	1	0	07/08/2020	0	1	1	1	06/06/2021	1	150	15/04/2021
16-Pum-2	2	16	Pum	47	1	1	1	0	01/11/2018	1	0	0	2	27/01/2019	0	998	30-12-1899
17-Pum-2	2	17	Pum	44	1	1	1	1	05/11/2016	1	1	1	1	30/10/2018	1	375	30/10/2018
18-Pum-2	2	18	Pum	27	1	1	1	1	01/07/2019	1	0	1	4	09/06/2020	0	998	30-12-1899
19-Pum-2	2	19	Pum	24	0	1	1	0	09/02/2016	1	1	1	1	07/02/2018	1	375	07/02/2018
20-Pum-2	2	20	Pum	73	1	0	8	1	04/12/2020	0	0	0	2	06/01/2021	0	998	30-12-1899
21-Pum-2	2	21	Pum	22	0	1	1	9	04/09/2014	1	1	1	1	29/08/2016	1	225	29/08/2016
22-Pum-2	2	22	Pum	37	1	1	1	0	30/06/2016	1	1	1	1	24/05/2018	0	998	30-12-1899
1-Mag-2	2	1	Mag	24	0	1	1	1	04/10/2019	0	1	1	0	26/09/2020	1	250	15/02/2020
2-Mag-2	2	2	Mag	33	0	1	1	0	05/11/2019	0	1	1	0	12/10/2020	1	250	15/02/2020
3-Mag-2	2	3	Mag	18	1	0	8	1	28/11/2019	0	0	0	2	04/02/2020	0	998	30-12-1899
4-Mag-2	2	4	Mag	48	1	1	1	1	11/07/2020	0	1	1	1	10/06/2021	1	175	15/04/2021
5-Mag-2	2	5	Mag	38	1	1	1	0	24/08/2018	0	0	0	4	15/12/2018	0	998	30-12-1899
6-Mag-2	2	6	Mag	39	0	1	1	0	18/03/2021	0	1	1	1	06/11/2021	1	175	15/04/2021
7-Mag-2	2	7	Mag	61	1	1	1	9	18/07/2018	1	0	0	2	10/09/2018	1	150	10/09/2018
8-Mag-2	2	8	Mag	55	1	1	1	9	12/05/2015	1	1	1	0	29/05/2017	1	75	29/05/2017
9-Mag-2	2	9	Mag	35	1	1	1	0	27/11/2015	1	1	1	0	31/07/2017	1	300	31/07/2017
10-Mag-2	2	10	Mag	35	1	1	1	9	14/11/2015	1	1	1	0	23/11/2017	1	300	23/11/2017
11-Mag-2	2	11	Mag	39	0	1	1	0	26/01/2015	1	1	1	1	19/01/2017	1	75	19/01/2017
12-Mag-2	2	12	Mag	40	0	1	1	1	15/01/2016	1	0	1	4	17/01/2017	1	150	17/01/2017
13-Mag-2	2	13	Mag	33	0	1	1	0	22/06/2015	1	1	1	0	19/06/2017	1	225	19/06/2017
14-Mag-2	2	14	Mag	35	1	1	1	0	16/03/2016	1	0	0	4	15/09/2016	1	175	15/09/2016
15-Mag-2	2	15	Mag	15	1	1	1	0	27/10/2014	1	1	1	0	24/07/2016	0	998	30-12-1899
16-Mag-2	2	16	Mag	27	1	1	1	0	07/05/2015	1	1	1	0	11/05/2017	1	75	11/05/2017
17-Mag-2	2	17	Mag	35	0	1	1	0	01/07/2014	1	0	1	4	29/03/2016	0	998	30-12-1899
18-Mag-2	2	18	Mag	28	1	1	1	1	11/02/2015	1	0	1	4	22/03/2016	1	75	22/03/2016
1-Cowd-2	2	1	Cowd	33	0	1	1	1	04/01/2017	1	1	1	1	08/04/2019	1	525	08/04/2019
2-Cowd-2	2	2	Cowd	33	0	1	1	0	08/03/2017	1	1	1	0	15/11/2018	1	450	15/11/2018
3-Cowd-2	2	3	Cowd	48	0	1	1	1	12/04/2017	1	1	1	0	10/01/2019	1	375	10/01/2019
4-Cowd-2	2	4	Cowd	32	1	1	1	1	29/06/2017	1	1	1	0	01/08/2019	1	150	01/08/2019
5-Cowd-2	2	5	Cowd	38	1	1	1	1	15/05/2018	1	0	0	2	04/07/2018	0	998	30-12-1899
6-Cowd-2	2	6	Cowd	32	1	1	1	0	02/09/2018	1	0	0	2	09/09/2018	0	998	30-12-1899
7-Cowd-2	2	7	Cowd	34	1	1	1	1	24/11/2018	0	1	1	0	17/12/2019	1	200	15/03/2019
8-Cowd-2	2	8	Cowd	46	0	1	1	0	12/01/2019	0	1	1	0	17/12/2019	1	50	15/02/2020
9-Cowd-2	2	9	Cowd	31	0	1	1	9	03/07/2019	0	1	1	1	02/04/2020	1	300	02/04/2020
10-Cowd-	2	10	Cowd	24	1	0	8	0	12/09/2019	0	0	0	4	30/11/2019	0	998	30-12-1899
11-Cowd-	2	11	Cowd	32	1	1	1	0	25/10/2019	0	1	1	0	27/09/2020	1	225	18/12/2019
12-Cowd-	2	12	Cowd	55	1	1	1	0	19/04/2019	0	1	1	1	02/03/2020	0	998	30-12-1899
13-Cowd-	2	13	Cowd	22	1	1	1	0	01/12/2016	1	0	0	4	23/02/2017	1	150	23/02/2017
14-Cowd-	2	14	Cowd	33	1	1	1	0	01/11/2016	1	0	1	4	18/07/2018	0	998	30-12-1899
15-Cowd-	2	15	Cowd	70	0	1	1	1	07/09/2016	1	1	1	0	15/05/2018	1	75	15/05/2018
16-Cowd-	2	16	Cowd	51	1	1	1	0	21/04/2017	1	1	1	0	24/04/2019	1	300	24/04/2019
17-Cowd-	2	17	Cowd	36	1	1	1	1	09/08/2017	1	0	0	4	30/09/2018	1	375	30/09/2018
18-Cowd-	2	18	Cowd	26	0	1	1	1	26/06/2018	1	0	0	2	25/08/2018	0	998	30-12-1899
19-Cowd-	2	19	Cowd	20	0	1	1	0	09/10/2018	1	1	1	0	17/12/2020	0	998	30-12-1899
20-Cowd-	2	20	Cowd	32	1	1	1	0	13/01/2018	1	0	0	2	22/01/2018	0	998	30-12-1899
21-Cowd-	2	21	Cowd	34	1	1	1	0	11/03/2019	0	1	1	0	28/03/2020	1	75	15/04/2019
22-Cowd-	2	22	Cowd	34	0	1	1	0	18/03/2019	0	1	1	0	13/04/2020	0	998	30-12-1899
1-Nju-2	2	1	Nju	32	0	1	1	1	12/09/2015	1	0	0	2	13/09/2015	0	998	30-12-1899
2-Nju-2	2	2	Nju	42	1	1	1	0	25/04/2016	1	0	1	4	26/11/2016	1	300	26/11/2016
3-Nju-2	2	3	Nju	23	0	1	1	9	14/05/2016	1	0	0	4	20/07/2016	1	225	20/07/2016
4-Nju-2	2	4	Nju	56	0	1	1	0	09/04/2016	1	0	0	2	12/05/2016	0	998	30-12-1899
5-Nju-2	2	5	Nju	47	1	1	1	1	13/07/2016	1	0	0	2	27/07/2016	0	998	30-12-1899
6-Nju-2	2	6	Nju	58	1	0	8	0	14/10/2016	0	0	0	2	14/10/2016	0	998	30-12-1899
7-Nju-2	2	7	Nju	45	0	1	0	0	10/04/2017	1	1	1	0	01/10/2018	1	300	01/10/2018
8-Nju-2	2	8	Nju	32	0	1	1	0	01/06/2017	1	0	0	4	08/01/2018	1	75	08/01/2018
9-Nju-2	2	9	Nju	21	0	0	8	0	17/06/2016	1	1	1	0	15/06/2018	1	400	15/06/2018
10-Nju-2	2	10	Nju	23	1	1	0	1	14/09/2017	1	0	1	2	06/05/2018	1	225	06/05/2018
11-Nju-2	2	11	Nju	42	0	1	1	0	19/10/2017	1	0	1	2	14/04/2018	0	998	30-12-1899
12-Nju-2	2	12	Nju	38	1	0	8	0	11/01/2018	1	1	1	0	09/07/2019	1	225	09/07/2019
13-Nju-2	2	13	Nju	73	1	0	8	0	25/09/2020	0	0	0	2	30/09/2020	0	998	30-12-1899
14-Nju-2	2	14	Nju	27	1	1	1	0	31/12/2018	1	1	1	0	15/08/2020	0	998	30-12-1899
15-Nju-2	2	15	Nju	42	0	1	1	0	17/09/2018	1	1	1	0	15/06/2020	0	998	30-12-1899
16-Nju-2	2	16	Nju	23	1	1	1	0	27/09/2018	1	1	1	0	15/05/2020	0	998	30-12-1899
17-Nju-2	2	17	Nju	20	0	0	8	0	14/12/2018	1	1	1	0	15/08/2020	1	150	15/08/2020
18-Nju-2	2	18	Nju	23	1	1	1	0	27/09/2017	1	1	1	0	15/03/2019	1	225	15/03/2019
1-Ema-2	2	1	Ema	64	1	1	1	0	16/03/2021	0	1	1	1	27/12/2021	0	998	30-12-1899
2-Ema-2	2	2	Ema	30	0	1	1	1	23/02/2017	1	0	0	2	25/04/2017	1	50	25/04/2017
3-Ema-2	2	3	Ema	41	1	1	1	0	12/05/2017	1	1	1	1	22/02/2019	1	75	22/02/2019
4-Ema-2	2	4	Ema	37	0	1	1	1	02/05/2017	1	1	1	1	29/11/2018	1	400	29/11/2018
5-Ema-2	2	5	Ema	38	0	0	8	1	08/08/2017	1	1	1	1	11/04/2019	1	375	11/04/2019
6-Ema-2	2	6	Ema	38	1	0	8	1	01/12/2017	1	1	1	1	10/10/2019	1	300	10/10/2019
7-Ema-2	2	7	Ema	28	0	1	1	0	22/03/2018	1	1	1	1	26/09/2019	1	225	26/09/2019
8-Ema-2	2	8	Ema	9	0	1	1	0	11/03/2016	1	1	1	1	13/12/2017	0	998	30-12-1899
9-Ema-2	2	9	Ema	27	0	0	8	0	08/02/2016	1	1	1	1	17/11/2017	1	300	17/11/2017
10-Ema-2	2	10	Ema	24	1	1	0	0	14/01/2016	1	0	0	2	14/01/2016	0	998	30-12-1899
11-Ema-2	2	11	Ema	43	1	0	8	0	23/11/2015	1	1	1	1	19/10/2017	0	998	30-12-1899
12-Ema-2	2	12	Ema	36	1	1	0	0	24/07/2015	1	1	1	1	17/05/2017	1	75	17/05/2017
1-Luv-2	2	1	Luv	38	1	1	1	0	21/05/2020	0	1	1	0	21/04/2021	1	50	21/04/2021
2-Luv-2	2	2	Luv	59	1	1	1	1	24/09/2020	0	1	1	1	15/08/2021	1	275	18/12/2020
3-Luv-2	2	3	Luv	23	1	1	1	0	13/10/2014	1	1	1	0	12/10/2016	1	75	12/10/2016
4-Luv-2	2	4	Luv	36	0	1	0	0	13/04/2016	1	0	0	2	17/05/2016	0	998	30-12-1899
5-Luv-2	2	5	Luv	34	0	1	1	0	06/04/2017	1	1	1	0	12/06/2019	1	400	12/12/2019
6-Luv-2	2	6	Luv	26	1	1	1	0	14/06/2017	1	1	1	0	15/06/2019	1	400	15/06/2019
7-Luv-2	2	7	Luv	47	0	1	1	0	08/08/2019	1	0	1	4	15/06/2020	0	998	30-12-1899
8-Luv-2	2	8	Luv	24	0	0	8	0	16/11/2019	0	1	1	0	17/09/2020	0	998	30-12-1899
9-Luv-2	2	9	Luv	35	0	1	1	9	13/04/2015	1	1	1	0	11/04/2017	1	150	11/04/2017
10-Luv-2	2	10	Luv	56	0	1	1	0	21/04/2015	1	0	0	2	16/07/2015	0	998	30-12-1899
11-Luv-2	2	11	Luv	48	0	1	1	1	07/07/2015	1	0	0	2	26/07/2015	0	998	30-12-1899
12-Luv-2	2	12	Luv	22	0	0	8	0	08/10/2014	1	1	1	0	18/10/2016	0	998	30-12-1899
13-Luv-2	2	13	Luv	43	1	1	1	1	31/08/2016	1	1	1	0	15/08/2018	1	375	15/08/2018
14-Luv-2	2	14	Luv	34	1	1	1	0	15/12/2016	1	1	1	0	15/12/2018	1	225	15/12/2018
15-Luv-2	2	15	Luv	28	1	1	1	9	09/05/2017	1	0	0	2	17/05/2017	0	998	30-12-1899
16-Luv-2	2	16	Luv	43	1	1	1	1	10/11/2017	1	1	1	0	15/08/2019	1	300	15/08/2019
17-Luv-2	2	17	Luv	43	1	1	1	9	30/09/2017	1	1	1	0	04/07/2019	1	225	04/07/2019
18-Luv-2	2	18	Luv	64	1	1	1	1	04/07/2018	1	0	0	4	09/10/2018	0	998	30-12-1899
1-Mzi-2	2	1	Mzi	41	0	1	1	1	09/10/2019	0	0	0	2	18/10/2019	0	998	30-12-1899
2-Mzi-2	2	2	Mzi	39	1	1	1	1	14/11/2019	0	0	0	4	20/03/2020	1	50	20/03/2020
3-Mzi-2	2	3	Mzi	38	1	1	1	1	20/12/2019	0	1	1	0	20/10/2020	1	50	15/04/2021
4-Mzi-2	2	4	Mzi	39	0	1	1	1	18/03/2020	0	0	0	2	02/06/2020	0	998	30-12-1899
5-Mzi-2	2	5	Mzi	33	1	1	1	1	15/05/2020	0	0	0	4	09/07/2020	0	998	30-12-1899
6-Mzi-2	2	6	Mzi	23	0	0	8	0	30/01/2021	0	1	1	1	25/11/2021	1	150	15/04/2021
1-Nda-3	3	1	Nda	38	1	1	1	0	02/11/2020	0	1	1	1	20/10/2021	1	275	15/02/2021
2-Nda-3	3	2	Nda	39	1	1	1	0	15/11/2018	1	1	1	1	20/02/2021	0	998	30-12-1899
3-Nda-3	3	3	Nda	30	1	0	8	0	10/10/2019	1	1	1	1	25/10/2021	0	998	30-12-1899
4-Mus-3	3	4	Mus	34	1	0	8	0	08/11/2017	1	0	0	4	10/01/2018	0	998	30-12-1899
5-Mus-3	3	5	Mus	27	0	1	1	0	09/11/2016	1	1	1	1	12/07/2018	0	998	30-12-1899
6-Mus-3	3	6	Mus	33	1	1	1	1	18/11/2016	1	0	0	4	13/04/2017	0	998	30-12-1899
7-Mus-3	3	7	Mus	34	0	1	1	0	19/05/2017	1	0	0	2	12/06/2017	0	998	30-12-1899
8-Mus-3	3	8	Mus	34	0	0	8	0	18/11/2020	0	1	1	1	20/10/2021	1	250	15/12/2020
9-Mus-3	3	9	Mus	33	0	1	1	1	04/08/2020	0	1	1	1	15/07/2021	1	200	15/02/2021
10-Mus-3	3	10	Mus	35	1	0	8	1	29/01/2018	1	1	1	1	20/01/2020	0	998	30-12-1899
11-Mus-3	3	11	Mus	51	1	1	1	0	24/01/2018	1	0	0	4	10/06/2018	0	998	30-12-1899
12-Mus-3	3	12	Mus	31	1	1	1	0	31/01/2018	1	0	0	4	20/05/2018	0	998	30-12-1899
13-Mus-3	3	13	Mus	35	1	1	1	0	22/11/2017	1	0	0	4	12/04/2018	0	998	30-12-1899
14-Mus-3	3	14	Mus	31	0	1	1	9	23/08/2016	1	1	1	1	15/08/2018	0	998	30-12-1899
15-Mus-3	3	15	Mus	30	1	0	8	1	11/09/2018	1	0	0	4	12/02/2019	0	998	30-12-1899
16-Mus-3	3	16	Mus	34	1	1	1	1	12/03/2019	1	0	0	2	08/05/2019	0	998	30-12-1899
17-Mus-3	3	17	Mus	34	1	1	1	9	10/10/2019	1	0	0	2	15/03/2020	0	998	30-12-1899
18-Mus-3	3	18	Mus	41	0	0	8	9	22/02/2018	1	1	1	1	18/02/2020	0	998	30-12-1899
20-Mus-3	3	20	Mus	20	1	1	1	9	12/03/2018	1	0	0	2	12/03/2018	0	998	30-12-1899
21-Mus-3	3	21	Mus	39	0	1	1	0	23/04/2019	1	0	0	2	23/04/2019	0	998	30-12-1899
22-Mus-3	3	22	Mus	42	1	1	1	1	08/01/2020	1	0	0	2	01/06/2020	1	150	15/02/2021
23-Mus-3	3	23	Mus	71	0	1	1	0	25/07/2016	1	0	0	2	25/07/2016	0	998	30-12-1899
24-Mus-3	3	24	Mus	30	1	0	8	0	18/11/2016	1	1	1	1	18/07/2018	0	998	30-12-1899
25-Mus-3	3	25	Mus	30	0	1	1	0	15/12/2016	1	0	1	2	15/09/2017	0	998	30-12-1899
1-Zim-3	3	1	Zim	51	0	0	8	1	12/05/2020	0	1	1	1	13/03/2021	1	175	15/02/2021
2-Zim-3	3	2	Zim	41	0	1	1	0	24/09/2019	1	1	1	1	21/06/2021	1	275	12/12/2019
12-Chi-3	3	12	Chi	39	0	1	1	9	24/07/2015	1	0	1	2	22/09/2015	1	75	22/09/2015
31-Mas-3	3	31	Mas	30	1	1	1	0	12/12/2016	1	1	1	0	13/12/2018	1	150	13/12/2018
37-Mas-3	3	37	Mas	46	1	1	9	9	05/03/2018	1	0	0	2	22/03/2018	0	998	30-12-1899
36-Mas-3	3	36	Mas	38	1	1	1	1	27/02/2018	1	0	0	2	27/02/2018	0	998	30-12-1899
38-Mas-3	3	38	Mas	27	0	1	1	0	11/04/2018	1	1	1	0	13/05/2020	1	75	13/05/2020
46-Mas-3	3	46	Mas	75	1	0	8	1	23/10/2018	1	0	0	2	07/01/2019	1	75	07/01/2019
47-Mas-3	3	47	Mas	44	1	1	1	1	19/12/2018	0	0	0	2	14/01/2019	0	998	30-12-1899
48-Mas-3	3	48	Mas	33	1	1	1	0	08/05/2019	1	0	0	4	19/09/2019	1	150	19/09/2019
50-Mas-3	3	50	Mas	50	1	0	8	0	07/04/2020	0	0	0	2	10/08/2020	0	998	30-12-1899
42-Mas-3	3	42	Mas	59	1	1	0	0	02/12/2019	0	0	0	2	03/02/2020	0	998	30-12-1899
41-Mas-3	3	41	Mas	72	0	0	8	0	15/05/2019	0	0	0	4	17/08/2019	0	998	30-12-1899
40-Mas-3	3	40	Mas	21	0	0	8	0	25/08/2018	1	1	1	0	20/06/2020	1	75	20/06/2020
39-Mas-3	3	39	Mas	32	0	1	0	0	13/09/2018	0	1	1	0	15/07/2019	1	75	15/07/2019
52-Mas-3	3	52	Mas	36	1	0	8	1	01/07/2020	0	0	0	2	25/08/2020	0	998	30-12-1899
1-Mas-3	3	1	Mas	33	1	1	1	0	30/03/2015	1	1	1	0	07/03/2017	1	75	07/03/2017
6-Mas-3	3	6	Mas	35	1	1	1	0	23/05/2014	1	1	1	0	28/06/2016	0	998	30-12-1899
10-Mas-3	3	10	Mas	24	1	0	8	1	06/07/2015	1	1	1	0	11/10/2017	1	150	11/10/2017
11-Mas-3	3	11	Mas	23	0	1	1	0	11/05/2015	1	1	1	1	11/05/2017	1	75	11/05/2017
12-Mas-3	3	12	Mas	27	1	1	1	0	06/05/2015	1	1	1	0	10/05/2017	1	550	10/05/2017
9-Mas-3	3	9	Mas	33	0	1	1	1	07/05/2014	1	1	1	0	10/05/2016	1	75	10/05/2016
8-Mas-3	3	8	Mas	32	0	1	1	1	29/04/2014	1	1	1	1	20/07/2016	1	75	20/07/2016
7-Mas-3	3	7	Mas	38	1	1	1	1	10/05/2014	1	0	1	4	03/10/2015	0	998	30-12-1899
5-Mas-3	3	5	Mas	41	0	1	1	1	19/09/2014	1	1	1	1	24/10/2016	1	75	24/10/2016
14-Mas-3	3	14	Mas	78	0	0	8	0	07/04/2016	1	0	0	2	26/04/2016	1	75	26/04/2016
4-Mas-3	3	4	Mas	44	0	1	1	0	25/02/2015	1	1	1	0	30/03/2017	1	75	30/03/2017
3-Mas-3	3	3	Mas	55	1	1	1	1	11/03/2017	1	0	1	2	17/10/2017	1	75	17/10/2017
2-Mas-3	3	2	Mas	24	1	1	1	1	27/08/2014	1	1	1	0	20/09/2016	1	75	20/09/2016
17-Mas-3	3	17	Mas	18	0	1	1	1	27/07/2015	1	1	1	0	05/07/2017	1	75	05/07/2017
16-Mas-3	3	16	Mas	33	1	1	1	1	04/05/2015	1	1	1	0	07/05/2017	1	75	07/05/2017
15-Mas-3	3	15	Mas	29	1	1	1	1	13/01/2016	1	1	1	0	20/03/2018	1	200	20/03/2018
20-Mas-3	3	20	Mas	33	1	0	8	0	21/07/2015	1	1	1	0	23/10/2017	1	75	23/10/2017
19-Mas-3	3	19	Mas	37	1	1	1	0	05/01/2016	1	1	1	1	12/01/2018	1	450	12/01/2018
18-Mas-3	3	18	Mas	48	1	1	1	0	17/02/2016	1	1	1	0	10/10/2017	1	375	10/10/2017
13-Mas-3	3	13	Mas	35	1	1	1	1	22/06/2016	1	0	1	2	20/05/2017	1	150	20/05/2017
23-Mas-3	3	23	Mas	53	0	1	1	1	22/06/2016	1	0	0	2	24/09/2016	1	75	24/09/2016
24-Mas-3	3	24	Mas	51	0	0	8	0	28/06/2016	1	1	1	0	28/06/2018	1	225	28/06/2018
21-Mas-3	3	21	Mas	34	1	1	1	0	19/02/2016	1	1	1	0	11/04/2018	1	250	11/04/2018
27-Mas-3	3	27	Mas	43	1	1	1	0	14/01/2016	1	1	1	0	14/06/2018	1	375	14/06/2018
44-Mas-3	3	44	Mas	38	0	0	8	0	19/03/2020	0	1	1	1	14/02/2021	1	275	16/06/2020
49-Mas-3	3	49	Mas	38	1	0	8	0	14/01/2020	0	1	1	1	28/12/2020	0	998	30-12-1899
51-Mas-3	3	51	Mas	36	1	0	8	0	31/10/2020	0	0	0	2	18/12/2020	1	225	15/02/2021
43-Mas-3	3	43	Mas	28	1	1	1	0	13/02/2020	0	1	1	1	10/01/2021	0	998	30-12-1899
29-Mas-3	3	29	Mas	16	1	0	8	0	18/08/2017	1	1	1	0	31/10/2019	0	998	30-12-1899
28-Mas-3	3	28	Mas	53	1	1	1	1	21/04/2017	1	0	0	2	21/04/2017	0	998	30-12-1899
35-Mas-3	3	35	Mas	24	0	1	1	1	10/10/2017	1	0	0	2	17/10/2017	0	998	30-12-1899
30-Mas-3	3	30	Mas	37	0	1	1	1	14/10/2017	1	1	1	0	15/12/2019	1	275	15/12/2019
33-Mas-3	3	33	Mas	31	0	1	1	1	18/07/2017	1	1	1	0	06/06/2019	1	375	06/06/2019
34-Mas-3	3	34	Mas	23	1	1	1	0	30/08/2017	1	0	1	4	15/12/2018	1	75	15/12/2018
32-Mas-3	3	32	Mas	36	1	1	1	0	12/07/2016	1	1	1	0	12/07/2018	1	325	12/07/2018
45-Mas-3	3	45	Mas	44	1	1	1	1	06/06/2020	0	1	1	1	10/05/2021	1	225	15/02/2021
1-Bei-4	4	1	Bei	28	0	1	1	0	11/07/2019	1	1	1	1	10/03/2021	1	325	15/10/2019
2-Bei-4	4	2	Bei	38	1	1	1	1	07/03/2018	1	0	0	2	13/08/2018	0	998	30-12-1899
3-Bei-4	4	3	Bei	35	0	1	1	0	27/04/2018	1	1	1	1	14/11/2019	1	225	15/07/2018
4-Bei-4	4	4	Bei	35	1	1	1	0	19/02/2018	1	1	1	1	10/10/2019	1	375	15/07/2018
5-Bei-4	4	5	Bei	35	1	9	9	1	20/05/2017	1	1	1	1	20/05/2019	0	998	30-12-1899
6-Bei-4	4	6	Bei	63	1	1	1	0	29/12/2016	1	1	1	1	10/12/2018	1	375	10/12/2018
7-Bei-4	4	7	Bei	50	0	1	1	1	21/09/2017	1	1	1	1	07/08/2019	1	225	07/08/2019
8-Bei-4	4	8	Bei	44	0	1	1	0	05/08/2017	1	1	1	1	05/08/2019	1	375	05/08/2019
9-Bei-4	4	9	Bei	32	1	1	1	1	18/05/2018	0	1	1	1	15/02/2019	0	998	30-12-1899
10-Bei-4	4	10	Bei	34	0	1	1	0	11/11/2019	0	0	0	2	19/12/2019	0	998	30-12-1899
11-Bei-4	4	11	Bei	59	0	1	1	0	26/09/2019	1	0	0	2	02/12/2019	0	998	30-12-1899
12-Bei-4	4	12	Bei	37	1	9	9	9	24/04/2019	1	0	0	2	28/09/2019	0	998	30-12-1899
13-Bei-4	4	13	Bei	34	0	1	1	0	20/03/2020	0	1	1	1	15/01/2021	1	225	15/02/2021
14-Bei-4	4	14	Bei	26	1	1	1	0	26/01/2021	0	1	1	1	12/11/2021	0	998	30-12-1899
15-Bei-4	4	15	Bei	46	0	1	1	0	10/04/2019	1	1	1	1	15/10/2020	1	325	15/02/2021
16-Bei-4	4	16	Bei	58	1	1	1	0	22/03/2019	1	1	1	1	21/12/2020	1	25	15/05/2019
17-Bei-4	4	17	Bei	49	1	1	1	0	14/10/2019	1	1	1	0	12/10/2021	1	225	15/02/2020
18-Bei-4	4	18	Bei	34	1	1	1	0	27/04/2020	0	1	1	1	15/04/2021	1	225	15/02/2021
19-Bei-4	4	19	Bei	44	1	0	8	1	07/02/2020	0	1	1	1	03/03/2021	1	225	15/06/2020
20-Bei-4	4	20	Bei	48	0	1	1	0	19/02/2020	0	1	1	1	01/03/2021	1	300	15/12/2020
21-Bei-4	4	21	Bei	34	1	1	1	1	15/03/2018	1	0	0	2	15/04/2018	0	998	30-12-1899
22-Bei-4	4	22	Bei	34	0	1	1	1	04/10/2017	1	0	0	4	22/10/2017	0	998	30-12-1899
23-Bei-4	4	23	Bei	18	0	1	1	0	16/01/2018	1	0	0	2	29/01/2018	0	998	30-12-1899
24-Bei-4	4	24	Bei	39	0	1	1	0	02/11/2018	1	0	0	2	03/02/2019	0	998	30-12-1899
25-Bei-4	4	25	Bei	66	0	9	9	0	12/05/2018	1	0	0	2	22/06/2018	0	998	30-12-1899
26-Bei-4	4	26	Bei	34	0	1	1	0	25/01/2018	1	1	1	1	25/09/2019	0	998	30-12-1899
27-Bei-4	4	27	Bei	40	1	9	9	0	14/03/2019	0	0	0	4	10/04/2019	1	25	15/05/2019
28-Bei-4	4	28	Bei	26	0	1	1	0	26/06/2018	1	1	1	0	24/07/2020	0	998	30-12-1899
29-Bei-4	4	29	Bei	34	1	9	9	0	11/12/2020	0	0	0	4	28/01/2021	0	998	30-12-1899
30-Bei-4	4	30	Bei	18	1	0	8	0	14/12/2018	0	1	1	1	15/11/2019	1	75	15/02/2019
31-Bei-4	4	31	Bei	23	0	9	9	0	07/07/2020	0	0	0	4	07/10/2020	1	150	15/02/2021
32-Bei-4	4	32	Bei	24	1	0	8	0	22/05/2018	1	1	1	0	23/05/2020	1	375	15/07/2018
1-Sta-4	4	1	Sta	31	1	1	1	0	06/10/2017	1	1	1	1	25/03/2019	0	998	30-12-1899
2-Sta-4	4	2	Sta	56	1	1	1	9	06/06/2019	1	1	1	1	26/02/2021	1	75	15/12/2020
3-Sta-4	4	3	Sta	28	0	1	1	0	21/07/2020	0	1	1	1	15/06/2021	1	150	15/02/2021
1-Sta -4	4	1	Sta	30	0	1	1	0	04/12/2017	1	1	1	1	10/01/2020	1	300	15/06/2017
2-Sta -4	4	2	Sta	30	1	1	1	0	08/09/2017	1	1	1	1	10/06/2019	0	998	30-12-1899
3-Sta -4	4	3	Sta	30	1	1	0	0	31/08/2017	1	0	1	4	03/10/2018	0	998	30-12-1899
4-Sta -4	4	4	Sta	48	1	1	1	1	20/08/2018	1	0	0	2	24/09/2018	0	998	30-12-1899
6-Sta -4	4	6	Sta	39	0	1	1	0	05/12/2019	1	0	1	1	12/11/2021	1	150	12/11/2021
7-Sta -4	4	7	Sta	43	1	1	1	1	21/07/2019	1	1	1	1	20/06/2021	1	250	20/06/2021
8-Sta -4	4	8	Sta	45	1	1	1	1	23/11/2020	1	0	0	4	28/02/2021	0	998	30-12-1899
9-Sta -4	4	9	Sta	45	1	0	8	0	06/11/2020	0	1	1	1	10/10/2021	1	225	15/02/2021
10-Sta -	4	10	Sta	35	0	1	1	1	05/07/2018	1	0	0	2	12/11/2018	0	998	30-12-1899
11-Sta -	4	11	Sta	50	1	1	1	0	31/10/2017	1	0	0	4	03/03/2018	0	998	30-12-1899
12-Sta -	4	12	Sta	30	0	0	8	1	08/09/2017	1	0	0	4	15/01/2018	1	75	15/01/2018
13-Sta -	4	13	Sta	54	1	1	1	0	21/01/2019	1	0	0	2	15/04/2019	0	998	30-12-1899
14-Sta -	4	14	Sta	38	0	1	1	1	20/08/2018	1	1	1	0	02/12/2020	0	998	30-12-1899
15-Sta -	4	15	Sta	37	1	1	1	0	02/01/2018	1	0	0	4	04/01/2018	0	998	30-12-1899
16-Sta -	4	16	Sta	24	0	1	1	1	21/10/2019	1	0	1	4	22/06/2020	1	225	22/06/2020
17-Sta -	4	17	Sta	32	0	1	1	1	18/12/2019	1	0	1	4	12/02/2021	0	998	30-12-1899
18-Sta -	4	18	Sta	42	1	1	1	0	13/06/2019	1	1	1	1	12/05/2021	1	200	15/02/2020
19-Sta -	4	19	Sta	38	1	1	1	1	24/06/2019	1	1	1	1	12/05/2021	1	375	15/02/2020
20-Sta -	4	20	Sta	26	1	1	1	0	28/06/2017	1	0	1	4	28/12/2017	1	75	28/12/2017
21-Sta -	4	21	Sta	33	1	0	8	0	08/08/2017	1	1	1	1	24/10/2019	0	998	30-12-1899
22-Sta -	4	22	Sta	44	1	1	1	0	06/10/2016	1	0	0	4	13/12/2016	0	998	30-12-1899
23-Sta -	4	23	Sta	31	1	1	1	0	30/09/2016	1	0	0	2	27/02/2017	0	998	30-12-1899
1-Mts-4	4	1	Mts	48	1	1	1	0	02/09/2016	1	0	0	2	14/09/2016	0	998	30-12-1899
2-Mts-4	4	2	Mts	35	1	1	1	0	06/06/2016	1	1	1	0	10/10/2017	1	300	15/08/2016
3-Mts-4	4	3	Mts	40	1	1	0	1	25/03/2017	1	0	1	2	03/02/2018	0	998	30-12-1899
4-Mts-4	4	4	Mts	40	1	1	1	9	30/09/2016	1	0	1	2	20/09/2017	1	225	15/08/2017
5-Mts-4	4	5	Mts	41	1	1	1	1	06/06/2016	1	1	1	0	08/06/2018	1	75	08/06/2018
6-Mts-4	4	6	Mts	45	1	1	1	9	14/06/2017	1	0	0	4	02/07/2017	1	75	02/07/2017
1-Man-4	4	1	Man	85	0	0	8	1	07/09/2015	1	0	0	2	28/01/2016	1	75	28/01/2016
2-Man-4	4	2	Man	59	0	0	8	0	13/10/2015	1	0	0	2	24/12/2015	0	998	30-12-1899
3-Man-4	4	3	Man	24	0	1	1	0	16/10/2015	1	0	0	2	30/10/2015	0	998	30-12-1899
4-Man-4	4	4	Man	83	0	0	8	0	29/10/2015	1	0	0	2	07/01/2016	0	998	30-12-1899
5-Man-4	4	5	Man	69	1	0	8	1	20/07/2015	1	1	1	1	04/04/2017	1	75	04/04/2017
6-Man-4	4	6	Man	37	1	1	1	0	04/01/2016	1	0	0	2	04/01/2016	0	998	30-12-1899
7-Man-4	4	7	Man	39	1	1	1	1	12/11/2015	1	0	0	2	12/11/2015	0	998	30-12-1899
8-Man-4	4	8	Man	52	1	1	1	1	27/07/2016	1	1	1	1	03/04/2018	1	450	15/06/2017
9-Man-4	4	9	Man	28	1	0	8	1	25/04/2016	1	1	1	1	15/04/2018	1	300	15/08/2017
10-Man-4	4	10	Man	41	1	1	1	0	26/01/2016	1	0	0	2	26/01/2016	0	998	30-12-1899
11-Man-4	4	11	Man	32	0	1	1	0	05/08/2016	1	1	1	1	08/05/2018	0	998	30-12-1899
12-Man-4	4	12	Man	26	1	1	1	1	29/09/2016	1	1	1	1	22/05/2018	0	998	30-12-1899
13-Man-4	4	13	Man	57	1	1	1	0	04/11/2015	1	0	1	2	03/06/2017	1	75	03/06/2017
14-Man-4	4	14	Man	42	0	1	1	0	21/04/2017	1	0	0	2	23/04/2017	0	998	30-12-1899
15-Man-4	4	15	Man	56	0	1	1	0	20/09/2018	1	0	0	2	10/10/2018	0	998	30-12-1899
16-Man-4	4	16	Man	51	0	1	1	0	03/09/2018	1	0	0	4	10/09/2018	0	998	30-12-1899
17-Man-4	4	17	Man	69	1	1	1	0	26/10/2018	1	0	1	2	19/07/2019	0	998	30-12-1899
18-Man-4	4	18	Man	20	0	0	8	0	03/02/2020	0	1	1	3	02/02/2021	1	75	15/02/2021
1-Gwa-4	4	1	Gwa	41	1	1	1	9	04/01/2017	1	1	1	0	05/01/2019	1	600	15/12/2017
2-Gwa-4	4	2	Gwa	31	0	0	8	0	09/01/2017	1	1	1	0	25/05/2018	1	150	15/12/2017
3-Gwa-4	4	3	Gwa	54	1	1	1	9	09/01/2017	1	0	0	2	10/01/2017	0	998	30-12-1899
4-Gwa-4	4	4	Gwa	32	0	1	1	1	08/02/2017	1	0	0	2	01/03/2017	1	100	15/06/2017
5-Gwa-4	4	5	Gwa	25	0	1	1	0	02/03/2017	1	0	0	2	30/06/2017	0	998	30-12-1899
6-Gwa-4	4	6	Gwa	31	1	1	1	0	22/11/2017	1	0	0	2	02/04/2018	0	998	30-12-1899
7-Gwa-4	4	7	Gwa	33	1	0	8	0	06/06/2018	1	0	1	4	05/05/2019	1	325	15/07/2018
8-Gwa-4	4	8	Gwa	42	1	0	8	0	28/08/2018	1	0	0	4	27/10/2019	0	998	30-12-1899
9-Gwa-4	4	9	Gwa	34	1	1	1	1	10/10/2018	1	1	1	0	11/10/2020	0	998	30-12-1899
10-Gwa-4	4	10	Gwa	45	1	1	1	0	19/11/2018	1	0	0	2	08/01/2019	0	998	30-12-1899
11-Gwa-4	4	11	Gwa	34	1	0	8	1	23/10/2019	1	0	0	4	20/01/2020	0	998	30-12-1899
12-Gwa-4	4	12	Gwa	35	1	1	1	0	30/01/2019	1	0	1	4	23/07/2020	0	998	30-12-1899
13-Gwa-4	4	13	Gwa	52	1	1	1	0	28/03/2019	1	0	0	4	25/06/2019	0	998	30-12-1899
14-Gwa-4	4	14	Gwa	55	1	0	8	0	29/03/2019	1	1	1	1	25/03/2020	1	150	15/08/2019
15-Gwa-4	4	15	Gwa	66	1	0	8	0	02/04/2019	1	0	0	2	15/05/2019	0	998	30-12-1899
16-Gwa-4	4	16	Gwa	32	1	0	8	0	20/05/2019	1	0	0	4	21/06/2019	0	998	30-12-1899
17-Gwa-4	4	17	Gwa	37	0	1	1	1	05/06/2019	0	1	1	1	10/04/2020	1	225	15/02/2020
19-Gwa-4	4	19	Gwa	19	0	1	1	0	26/06/2019	1	0	0	4	27/06/2019	1	75	27/06/2019
20-Gwa-4	4	20	Gwa	26	0	1	1	1	06/08/2019	1	0	0	2	08/10/2019	0	998	30-12-1899
21-Gwa-4	4	21	Gwa	52	1	1	1	1	03/09/2019	1	0	0	2	30/09/2019	1	250	15/02/2021
22-Gwa-4	4	22	Gwa	32	0	1	1	0	13/09/2019	1	0	1	4	15/06/2020	1	75	15/02/2021
23-Gwa-4	4	23	Gwa	31	0	1	1	0	10/06/2020	0	1	1	1	05/05/2021	1	200	15/02/2021
25-Gwa-4	4	25	Gwa	32	1	0	8	0	14/10/2020	0	1	1	1	13/09/2021	1	225	15/02/2021
26-Gwa-4	4	26	Gwa	34	1	1	1	0	12/02/2021	0	0	0	4	13/05/2021	0	998	30-12-1899
1-Plu-4	4	1	Plu	66	0	1	1	0	22/04/2015	1	0	0	2	29/04/2015	0	998	30-12-1899
2-Plu-4	4	2	Plu	39	1	1	1	1	26/06/2015	1	1	1	1	20/06/2017	1	75	15/04/2016
3-Plu-4	4	3	Plu	43	0	1	1	1	24/02/2015	1	0	1	2	11/02/2016	0	998	30-12-1899
4-Plu-4	4	4	Plu	37	1	1	1	1	29/04/2016	1	1	1	1	30/04/2018	1	225	15/12/2017
5-Plu-4	4	5	Plu	48	0	1	1	1	03/08/2016	1	0	0	4	12/09/2016	0	998	30-12-1899
6-Plu-4	4	6	Plu	42	1	1	1	1	04/04/2017	1	0	0	4	15/10/2017	1	75	15/06/2017
7-Plu-4	4	7	Plu	37	1	1	1	1	13/09/2017	1	1	1	1	14/09/2019	0	998	30-12-1899
8-Plu-4	4	8	Plu	49	1	1	1	1	15/12/2017	1	1	1	1	15/11/2019	0	998	30-12-1899
11-Plu-4	4	11	Plu	49	1	1	1	0	03/06/2019	1	0	0	2	30/07/2019	0	998	30-12-1899
12-Plu-4	4	12	Plu	36	1	1	1	1	16/09/2019	0	1	1	1	12/08/2020	0	998	30-12-1899
13-Plu-4	4	13	Plu	13	1	0	8	0	06/05/2020	0	1	1	1	10/04/2021	1	225	15/02/2021
14-Plu-4	4	14	Plu	38	1	1	1	0	03/05/2019	1	1	1	1	10/05/2021	1	325	15/02/2020
15-Plu-4	4	15	Plu	32	1	1	1	0	05/02/2020	0	1	1	1	15/02/2021	1	225	15/12/2020
16-Plu-4	4	16	Plu	32	1	0	8	0	25/03/2019	1	0	1	2	06/06/2020	0	998	30-12-1899
17-Plu-4	4	17	Plu	52	1	1	1	1	22/05/2018	1	0	1	2	10/06/2019	1	225	15/07/2018
18-Plu-4	4	18	Plu	43	1	0	8	1	11/01/2018	1	1	1	1	12/01/2020	1	300	15/01/2018
19-Plu-4	4	19	Plu	29	0	1	1	0	21/10/2017	1	0	0	2	15/03/2018	0	998	30-12-1899
20-Plu-4	4	20	Plu	30	1	1	1	1	11/10/2017	1	0	0	2	12/10/2017	0	998	30-12-1899
21-Plu-4	4	21	Plu	22	0	1	1	0	27/03/2017	1	1	1	1	29/03/2019	0	998	30-12-1899
22-Plu-4	4	22	Plu	34	0	1	1	1	06/04/2016	1	1	1	1	20/02/2018	1	300	15/06/2017
23-Plu-4	4	23	Plu	43	1	1	1	1	03/02/2016	1	0	1	2	19/04/2016	0	998	30-12-1899
24-Plu-4	4	24	Plu	54	0	1	1	1	25/08/2015	1	1	1	1	26/08/2017	0	998	30-12-1899
25-Plu-4	4	25	Plu	27	0	1	1	1	03/06/2015	1	1	1	1	04/06/2017	1	75	04/06/2017
26-Plu-4	4	26	Plu	44	1	1	1	1	20/06/2019	1	0	0	2	28/07/2019	0	998	30-12-1899
27-Plu-4	4	27	Plu	38	1	1	1	1	17/11/2020	0	1	1	1	10/10/2021	1	225	15/02/2021
1-Pha-4	4	1	Pha	36	0	1	1	0	04/10/2017	0	1	1	1	10/10/2018	1	300	15/12/2017
2-Pha-4	4	2	Pha	35	1	1	1	0	06/09/2017	1	1	1	1	10/07/2019	0	998	30-12-1899
3-Pha-4	4	3	Pha	30	1	1	1	0	13/02/2018	1	0	1	4	04/05/2019	1	350	15/06/2018
4-Pha-4	4	4	Pha	34	1	1	1	0	03/03/2018	1	0	0	4	23/07/2018	0	998	30-12-1899
5-Pha-4	4	5	Pha	26	0	0	8	0	06/04/2018	1	0	1	4	04/12/2019	1	225	15/07/2018
6-Pha-4	4	6	Pha	36	1	1	1	1	03/10/2018	1	1	1	1	25/08/2020	0	998	30-12-1899
7-Pha-4	4	7	Pha	37	1	1	0	0	15/01/2019	1	0	1	4	23/07/2020	1	25	25/05/2019
11-Chi-3	3	11	Chi	32	0	1	1	0	27/03/2015	1	1	1	1	23/02/2017	1	75	23/11/2017
9-Chi-3	3	9	Chi	31	0	0	8	0	15/01/2015	1	1	1	1	01/09/2016	1	75	01/09/2016
10-Chi-3	3	10	Chi	45	0	1	1	0	16/03/2015	1	0	0	2	13/08/2015	0	998	30-12-1899
7-Muc-3	3	7	Muc	43	0	1	1	1	25/03/2015	1	1	1	1	15/03/2017	1	150	15/03/2017
8-Muc-3	3	8	Muc	50	0	1	1	0	08/01/2019	1	1	1	1	20/01/2021	0	998	30-12-1899
4-Ruje-3	3	4	Ruje	47	1	0	8	0	05/12/2019	1	1	1	1	15/05/2021	1	225	15/02/2020
1-Run-3	3	1	Run	36	1	1	1	1	28/07/2020	0	0	0	2	25/08/2020	0	998	30-12-1899
1-Mor-3	3	1	Mor	22	1	1	1	1	02/06/2018	1	0	0	2	08/07/2018	0	998	30-12-1899
1-Ruje-3	3	1	Ruje	41	0	1	1	0	07/08/2020	0	0	0	1	10/07/2021	1	250	15/02/2021
2-Ruje-3	3	2	Ruje	29	1	0	8	0	19/02/2020	0	1	1	1	15/12/2020	1	75	15/02/2021
3-Ruje-3	3	3	Ruje	42	1	1	1	1	01/11/2019	1	1	1	1	10/10/2021	1	350	15/02/2021
3-Run-3	3	3	Run	51	0	1	1	1	11/01/2019	1	0	0	4	30/04/2019	0	998	30-12-1899
2-Muc-3	3	2	Muc	33	1	0	8	1	21/07/2015	1	1	1	1	08/10/2017	1	75	08/10/2017
4-Muc-3	3	4	Muc	28	1	1	1	1	10/10/2017	1	1	1	1	20/08/2019	0	998	30-12-1899
5-Muc-3	3	5	Muc	36	0	1	1	1	19/02/2019	1	1	1	1	28/02/2021	1	600	12/06/2019
2-Mor-3	3	2	Mor	38	1	1	1	1	12/03/2016	1	0	0	2	15/04/2016	0	998	30-12-1899
3-Mor-3	3	3	Mor	46	1	1	1	0	10/03/2016	1	0	0	2	25/05/2016	1	50	25/05/2016
4-Mor-3	3	4	Mor	26	0	1	1	0	23/04/2016	1	0	0	2	15/05/2016	0	998	30-12-1899
5-Mor-3	3	5	Mor	65	0	1	1	0	04/07/2016	1	0	0	2	31/08/2016	1	50	31/08/2018
6-Mor-3	3	6	Mor	41	0	0	8	0	10/11/2019	1	1	1	1	10/10/2021	1	275	15/02/2020
7-Mor-3	3	7	Mor	21	0	0	8	0	05/07/2019	1	0	0	4	26/07/2019	0	998	30-12-1899
8-Mor-3	3	8	Mor	24	0	0	8	0	16/02/2019	1	0	0	4	30/06/2019	0	998	30-12-1899
13-High-	1	13	High	32	1	1	1	1	28/08/2020	0	1	1	1	15/07/2021	1	200	15/02/2021
8-High-1	1	8	High	32	1	1	1	0	15/09/2018	1	1	1	1	15/11/2020	1	175	19/12/2018
4-Kuw-1	1	4	Kuw	51	1	1	1	0	29/08/2017	1	0	1	4	15/03/2018	1	75	15/03/2018
8-Kuw-1	1	8	Kuw	27	0	1	1	0	21/09/2018	1	1	1	1	20/03/2020	0	998	30-12-1899
4-Gle-1	1	4	Gle	35	0	1	1	0	02/11/2018	1	1	1	1	15/11/2020	0	998	30-12-1899
4-Muf-1	1	4	Muf	37	1	1	1	0	20/05/2020	0	0	1	3	15/12/2020	1	175	15/12/2020
10-Gle-1	1	10	Gle	35	1	0	8	1	06/07/2017	1	0	0	4	17/10/2017	0	998	30-12-1899
3-Kuw-1	1	3	Kuw	27	1	0	8	1	10/04/2017	1	0	1	1	02/11/2018	1	375	02/11/2018
6-Gle-1	1	6	Gle	63	0	1	1	9	28/11/2018	1	1	1	1	29/11/2020	0	998	30-12-1899
5-Buds-1	1	5	Buds	41	0	1	1	1	07/02/2019	1	1	1	1	01/03/2021	1	375	15/05/2019
4-Buds-1	1	4	Buds	31	1	1	1	1	16/10/2018	1	0	1	4	16/04/2019	0	998	30-12-1899
3-Bud-1	1	3	Bud	30	1	1	1	1	05/02/2016	1	0	0	2	10/03/2016	0	998	30-12-1899
9-Gle-1	1	9	Gle	35	1	1	1	1	05/01/2017	1	0	0	4	20/04/2017	1	450	20/04/2017
1-Gle-1	1	1	Gle	46	0	1	1	0	21/08/2018	1	0	1	4	15/03/2019	0	998	30-12-1899
11-Gle-1	1	11	Gle	44	1	1	1	0	06/11/2019	1	0	1	4	15/06/2020	1	225	15/02/2020
7-Buds-1	1	7	Buds	43	1	1	1	1	17/07/2019	1	0	0	1	17/06/2021	1	250	15/10/2019
4-Mba-1	1	4	Mba	39	1	0	8	0	18/07/2018	1	1	1	1	20/02/2020	0	998	30-12-1899
1-Mba-1	1	1	Mba	59	0	0	8	1	12/05/2018	1	1	1	1	20/02/2020	1	575	15/09/2018
3-Mba-1	1	3	Mba	34	0	1	1	9	26/07/2018	1	1	1	1	15/02/2020	0	998	30-12-1899
1-Buds-1	1	1	Buds	35	1	1	1	0	30/11/2017	1	0	0	4	19/02/2018	0	998	30-12-1899
14-High-	1	14	High	43	1	1	1	0	14/08/2020	0	0	0	4	15/12/2020	1	75	15/02/2021
16-Ruj-1	1	16	Ruj	53	1	0	8	0	15/04/2019	0	1	1	0	15/04/2020	0	998	30-12-1899
18-Ruj-1	1	18	Ruj	18	0	0	8	1	17/04/2019	0	0	1	4	26/03/2020	0	998	30-12-1899
20-Ruj-1	1	20	Ruj	48	1	1	1	0	26/06/2019	0	1	1	0	26/06/2020	0	998	30-12-1899
13-Ruj-1	1	13	Ruj	39	1	0	8	1	27/02/2017	1	1	1	0	27/02/2019	1	475	27/02/2019
21-Ruj-1	1	21	Ruj	40	1	1	1	0	18/08/2017	1	1	1	0	17/10/2019	1	300	17/10/2019
4-Ruj-1	1	4	Ruj	42	0	1	1	0	01/03/2018	0	1	1	0	15/12/2018	1	225	15/12/2018
2-Ruj-1	1	2	Ruj	29	1	0	8	0	16/02/2018	0	1	1	0	20/11/2018	1	225	20/11/2018
12-Ruj-1	1	12	Ruj	45	1	1	1	0	23/08/2018	1	1	1	1	08/09/2020	0	998	30-12-1899
14-Ruj-1	1	14	Ruj	49	0	0	8	1	10/07/2018	1	1	1	1	12/02/2020	0	998	30-12-1899
10-Ruj-1	1	10	Ruj	39	0	1	1	0	13/05/2018	0	0	0	2	01/08/2018	0	998	30-12-1899
8-Ruj-1	1	8	Ruj	44	1	0	8	1	20/04/2018	1	1	1	1	15/04/2020	1	75	15/04/2020
6-Ruj-1	1	6	Ruj	69	1	9	9	1	20/03/2018	1	0	1	2	16/11/2018	1	175	16/11/2018
9-Muf-1	1	9	Muf	47	1	1	1	1	19/11/2014	1	1	1	0	11/09/2016	1	175	11/09/2016
7-Muf-1	1	7	Muf	25	0	1	1	0	20/05/2015	1	0	1	4	13/02/2016	1	50	13/02/2016
3-Muf-1	1	3	Muf	56	1	1	1	0	16/03/2020	0	0	0	2	15/05/2020	0	998	30-12-1899
12-Kuw-1	1	12	Kuw	25	1	9	9	1	30/05/2016	1	0	0	4	13/06/2016	1	75	13/06/2016
6-Kuw-1	1	6	Kuw	48	1	1	1	0	31/05/2018	1	0	0	4	15/07/2018	0	998	30-12-1899
11-Kuw-1	1	11	Kuw	23	0	1	1	1	29/01/2019	1	0	0	2	30/06/2019	0	998	30-12-1899
2-Kuw-1	1	2	Kuw	34	0	1	1	1	04/08/2017	1	0	0	2	15/10/2017	1	50	15/10/2017
5-Kuw-1	1	5	Kuw	40	1	1	1	0	12/04/2016	1	1	1	0	31/08/2018	0	998	30-12-1899
5-Ruj-1	1	5	Ruj	38	1	1	1	0	22/10/2015	1	1	1	1	09/08/2017	0	998	30-12-1899
1-Ruj-1	1	1	Ruj	38	0	1	1	1	04/03/2015	1	0	0	2	08/07/2015	1	75	08/07/2015
3-Ruj-1	1	3	Ruj	37	0	1	1	1	30/09/2015	1	0	0	2	23/11/2015	0	998	30-12-1899
7-High-1	1	7	High	23	1	0	8	0	24/06/2017	1	0	0	4	24/06/2017	0	998	30-12-1899
6-High-1	1	6	High	19	0	0	8	0	04/06/2019	1	1	1	1	23/12/2020	1	300	20/08/2019
5-High-1	1	5	High	47	1	1	1	0	10/11/2017	1	1	1	0	12/12/2019	0	998	30-12-1899
4-High-1	1	4	High	32	1	1	1	0	17/06/2017	1	1	1	0	17/03/2019	0	998	30-12-1899
3-High-1	1	3	High	20	0	1	1	9	25/08/2018	1	0	1	2	10/09/2018	0	998	30-12-1899
2-High-1	1	2	High	22	1	0	8	0	20/06/2016	1	1	1	1	27/06/2018	0	998	30-12-1899
1-High-1	1	1	High	30	1	0	8	0	11/01/2018	1	0	0	4	23/05/2018	0	998	30-12-1899
9-High-1	1	9	High	49	1	1	1	0	26/07/2017	1	1	1	0	14/06/2019	0	998	30-12-1899
12-High-	1	12	High	36	1	1	1	1	03/07/2017	1	0	1	2	02/07/2018	0	998	30-12-1899
10-High-	1	10	High	20	1	1	1	0	02/10/2017	1	1	1	1	16/07/2019	0	998	30-12-1899
3-Gle-1	1	3	Gle	32	0	1	1	0	28/08/2018	1	1	1	0	28/09/2020	1	500	15/10/2018
7-Gle-1	1	7	Gle	26	0	1	1	1	08/10/2018	1	1	1	1	08/10/2020	1	575	12/12/2018
2-Gle-1	1	2	Gle	40	1	1	1	0	19/09/2018	1	1	1	1	09/08/2020	1	575	15/10/2018
8-Gle-1	1	8	Gle	52	0	1	1	0	20/07/2018	1	1	1	0	20/04/2020	1	75	15/10/2018
2-Buds-1	1	2	Buds	38	1	1	1	0	19/11/2015	1	0	0	2	19/12/2015	0	998	30-12-1899
1-Bud-1	1	1	Bud	28	1	0	8	1	02/07/2015	1	1	1	1	17/02/2017	0	998	30-12-1899
12-Gle-1	1	12	Gle	22	0	0	8	1	01/04/2019	1	1	1	1	01/03/2021	1	575	20/06/2019
18-Gle-1	1	18	Gle	36	0	1	1	9	17/12/2018	1	0	0	2	15/05/2019	0	998	30-12-1899
5-Gle-1	1	5	Gle	46	1	1	1	1	16/11/2018	1	0	1	2	12/10/2019	0	998	30-12-1899
7-Ruj-1	1	7	Ruj	45	1	1	1	1	22/02/2016	1	0	0	2	30/03/2016	0	998	30-12-1899
9-Ruj-1	1	9	Ruj	40	0	1	1	0	21/02/2015	1	1	1	0	02/10/2016	0	998	30-12-1899
11-Ruj-1	1	11	Ruj	56	1	0	8	1	07/01/2015	1	0	1	2	19/10/2016	1	75	19/10/2016
26-Ruj-1	1	26	Ruj	41	1	1	1	0	13/02/2020	0	1	1	1	12/01/2021	1	225	18/12/2020
5-Mba-1	1	5	Mba	46	1	1	1	9	15/11/2018	1	1	1	1	10/10/2020	0	998	30-12-1899
2-Mba-1	1	2	Mba	35	1	0	8	1	26/07/2018	1	1	1	1	20/07/2020	0	998	30-12-1899
11-High-	1	11	High	24	0	1	1	0	03/12/2018	1	0	1	4	05/06/2019	0	998	30-12-1899
6-Buds-1	1	6	Buds	38	1	1	1	1	08/11/2017	1	0	0	2	15/01/2018	0	998	30-12-1899
5-Muf-1	1	5	Muf	37	1	1	1	0	18/05/2020	0	1	1	1	10/04/2021	1	175	15/02/2021
22-Ruj-1	1	22	Ruj	40	1	1	1	1	17/01/2020	0	1	1	1	18/11/2020	0	998	30-12-1899
23-Ruj-1	1	23	Ruj	38	1	0	8	0	22/01/2020	0	1	1	1	06/01/2021	1	250	18/03/2020
1-Kuw-1	1	1	Kuw	21	1	0	8	0	07/01/2015	1	0	0	4	10/04/2015	0	998	30-12-1899
10-Kuw-1	1	10	Kuw	35	0	1	1	1	01/04/2019	1	1	1	1	15/03/2021	0	998	30-12-1899
9-Kuw-1	1	9	Kuw	27	1	1	1	0	27/03/2019	1	1	1	1	20/03/2021	1	600	18/06/2019
7-Kuw-1	1	7	Kuw	31	1	1	1	0	28/02/2018	1	0	0	4	25/08/2018	1	150	20/04/2018
